# Supplementary material for: Experimental and theoretical investigation on MoS2/MXene heterostructure as an efficient electrocatalyst for hydrogen evolution in both acidic and alkaline media
Source: Royal Society of Chemistry journal article supplement (doi:10.1039/d0nj00956c), 2020-01-01
Supplement: d0nj00956c1.pdf [file d0nj00956c1.pdf]

Electronic Supplementary Material (ESI) for New Journal of Chemistry.  
This journal is © The Royal Society of Chemistry and the Centre National de la Recherche Scientifique  
2020

NEW J CHEM

---

## Electronic Supplementary Information

### **Experimental and theoretical investigation on MoS<sub>2</sub>/MXene heterostructure as an efficient electrocatalyst for PH-universal hydrogen evolution reaction**

Le Hu<sup>a</sup>, Yuyun Sun<sup>a</sup>, Shi-Jing Gong<sup>a</sup>, Hui Zong<sup>a</sup>, Ke Yu<sup>\*a,b</sup> and Ziqiang Zhu<sup>a</sup>

<sup>a</sup> *Key Laboratory of Polar Materials and Devices (MOE), Department of Electronics, East China Normal University, Shanghai 200241, China*

<sup>b</sup> *Collaborative Innovation Center of Extreme Optics, Shanxi University, Taiyuan, Shanxi 030006, China*

\* Corresponding Author:

*Tel:* +86-21-54345198.

*E-mail address:* yk5188@263.net.

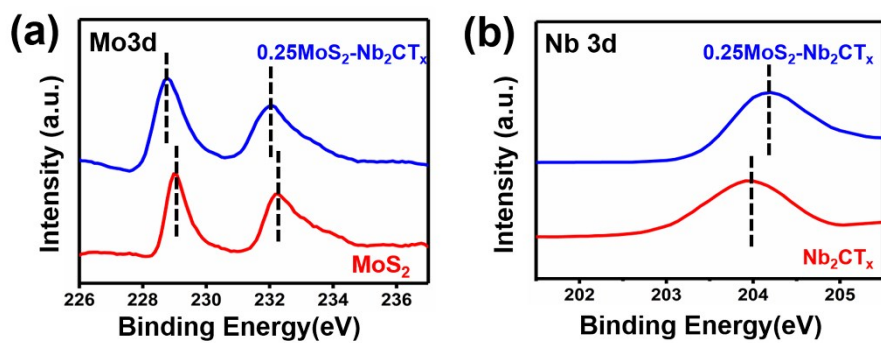

**Fig. S1** (a) Mo 3d XPS spectra of 0.25 MoS<sub>2</sub>-Nb<sub>2</sub>CT<sub>x</sub> heterostructure and MoS<sub>2</sub>. (b) Nb 3d XPS spectra of 0.25 MoS<sub>2</sub>-Nb<sub>2</sub>CT<sub>x</sub> heterostructure and Nb<sub>2</sub>CT<sub>x</sub>.

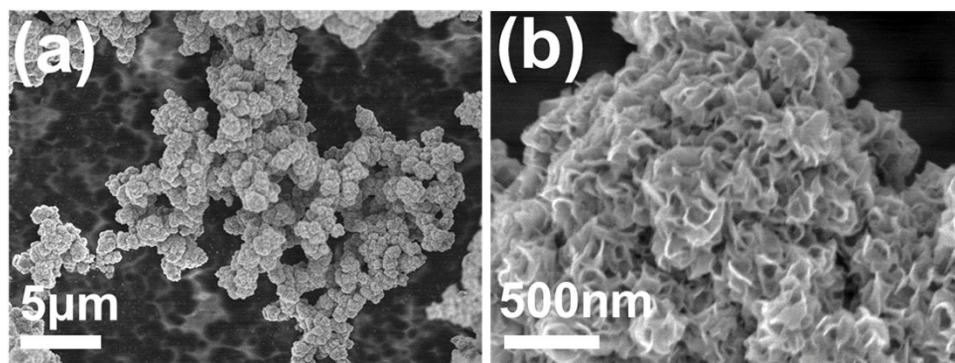

**Fig. S2** SEM images of MoS<sub>2</sub>.

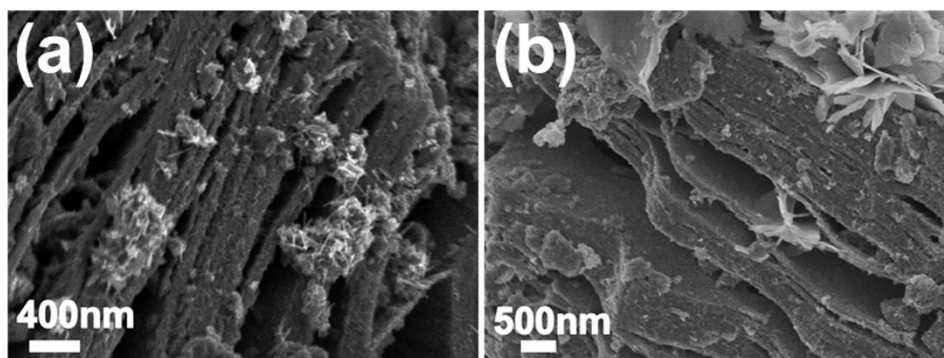

**Fig. S3** SEM images of 0.15 MoS<sub>2</sub>-Nb<sub>2</sub>CT<sub>x</sub> and 0.35 MoS<sub>2</sub>-Nb<sub>2</sub>CT<sub>x</sub> heterostructures: (a) SEM image of 0.15 MoS<sub>2</sub>-Nb<sub>2</sub>CT<sub>x</sub> heterostructure. (b) SEM image of 0.35 MoS<sub>2</sub>-Nb<sub>2</sub>CT<sub>x</sub> heterostructure.

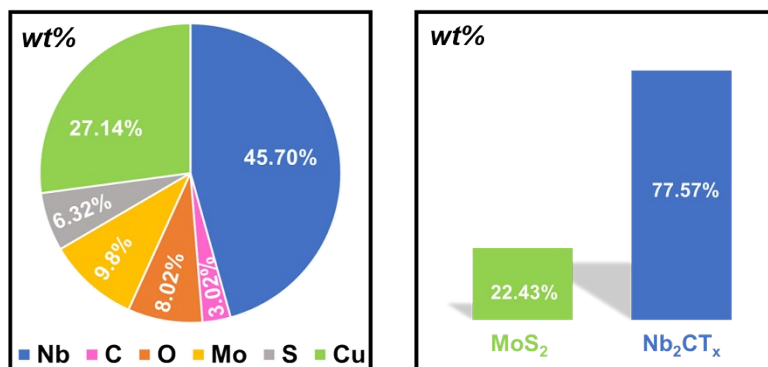

**Fig. S4** Mass ratio diagram of elements and chemical composition in 0.25 MoS<sub>2</sub>-Nb<sub>2</sub>CT<sub>x</sub> sample. Because the proportion of Al element is only 0.12%, it is not exhibited in the figure.

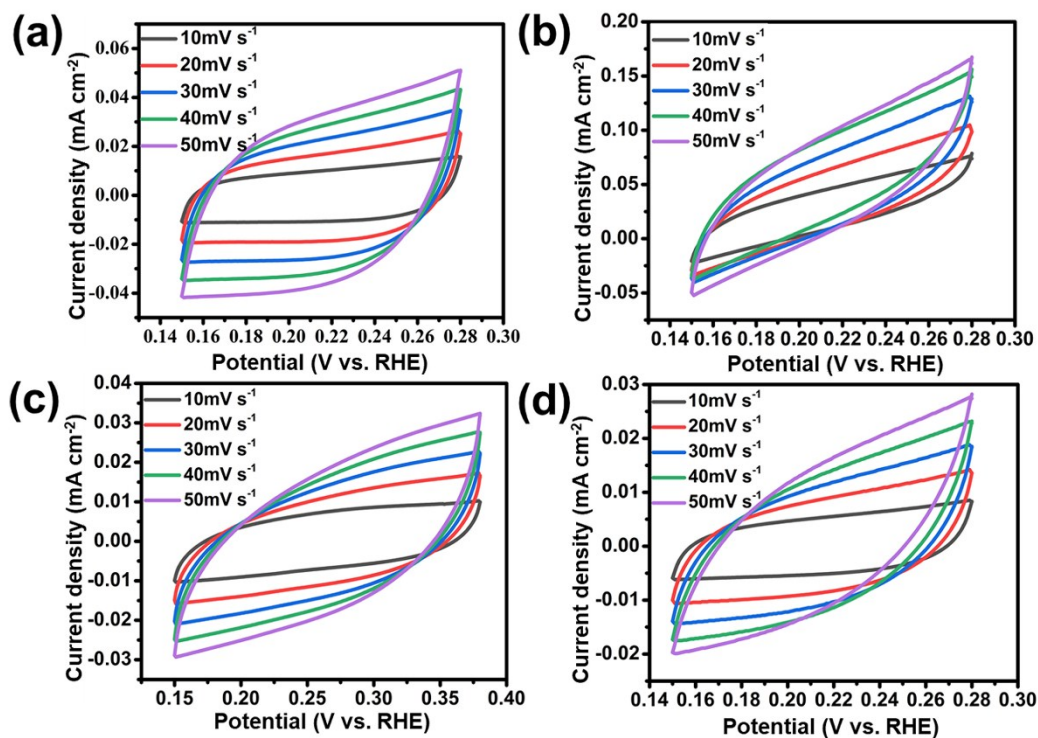

**Fig. S5** CV Cyclic voltammetry curves of MoS<sub>2</sub>, Nb<sub>2</sub>CT<sub>x</sub>, 0.15 MoS<sub>2</sub>-Nb<sub>2</sub>CT<sub>x</sub>, and 0.35 MoS<sub>2</sub>-Nb<sub>2</sub>CT<sub>x</sub>: (a) CV Cyclic voltammetry curve of MoS<sub>2</sub>, (b) CV Cyclic voltammetry curve of Nb<sub>2</sub>CT<sub>x</sub>, (c) CV Cyclic voltammetry curve of 0.15 MoS<sub>2</sub>-Nb<sub>2</sub>CT<sub>x</sub>, (d) CV Cyclic voltammetry curve of 0.35 MoS<sub>2</sub>-Nb<sub>2</sub>CT<sub>x</sub>.

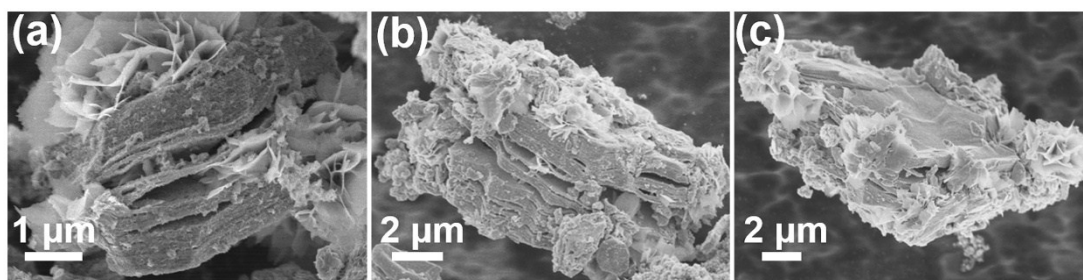

**Fig. S6** SEM images of 0.25 MoS<sub>2</sub>-Nb<sub>2</sub>CT<sub>x</sub> before and after the cycles.

(a) SEM image of 0.25 MoS<sub>2</sub>-Nb<sub>2</sub>CT<sub>x</sub> before the cycles. (b) SEM image of the composite after the potential sweeps for 3000 cycles in acidic medium. (c) SEM image of the composite after the potential sweeps for 3000 cycles in alkaline medium.

**Table S1.** Comparison of HER performances for MoS<sub>2</sub>-Nb<sub>2</sub>CT<sub>x</sub> with related MoS<sub>2</sub>-based catalysts.

| Catalyst                                                        | Overpotential (mV) | Tafel slope (mV dec <sup>-1</sup> ) | R <sub>ct</sub> | Electrolyte                          | Reference |
|-----------------------------------------------------------------|--------------------|-------------------------------------|-----------------|--------------------------------------|-----------|
| MoS <sub>2</sub> -Nb <sub>2</sub> CT <sub>x</sub>               | 127                | 56.2                                | 63.1            | 0.5 M H <sub>2</sub> SO <sub>4</sub> | This work |
| MoS <sub>2</sub> -Ti <sub>3</sub> C <sub>2</sub> T <sub>x</sub> | 152                | 70                                  | -               | 0.5 M H <sub>2</sub> SO <sub>4</sub> | 1         |
| MoS <sub>2</sub> -GF                                            | 157                | 93                                  | 47.3            | 0.5 M H <sub>2</sub> SO <sub>4</sub> | 2         |
| Ni@NC/MoS <sub>2</sub> -P                                       | 325                | 118.2                               | 28.6            | 0.5 M H <sub>2</sub> SO <sub>4</sub> | 3         |
| Cu-MoS <sub>2</sub> /rGo                                        | 244                | 127                                 | -               | 0.5 M H <sub>2</sub> SO <sub>4</sub> | 4         |
| CoP/CN @ MoS <sub>2</sub>                                       | 144                | 69                                  | -               | 0.5 M H <sub>2</sub> SO <sub>4</sub> | 5         |
| MoS <sub>2</sub> -Nb <sub>2</sub> CT <sub>x</sub>               | 141                | 93.4                                | 231.4           | 1 M KOH                              | This work |
| (NiFe) <sub>x</sub> -MoS <sub>2</sub>                           | 285                | 94                                  | -               | 1 M KOH                              | 6         |
| MoS <sub>2</sub> -Co(OH) <sub>2</sub>                           | 179                | 62                                  | -               | 1 M KOH                              | 7         |
| MoS <sub>2</sub> @3DC                                           | 252                | 102.8                               | 316.3           | 1 M KOH                              | 8         |
| Fe-MoS <sub>2</sub>                                             | 163                | 181                                 | -               | 1 M KOH                              | 9         |
| Co-MoS <sub>2</sub>                                             | 215                | 153                                 | 175             | 1 M KOH                              | 10        |
| Ni-P/MoS <sub>2</sub>                                           | 155                | 108                                 | 2758            | 1 M KOH                              | 11        |



## REFERENCES

- 1 J. Liu, Y. Liu, D. Xu, Y. Zhu, W. Peng, Y. Li, F. Zhang and X. Fan, *Appl. Catal. B*, 2019, **241**, 89-94.
- 2 B. Liu, S. Wang, Q. Mo, L. Peng, S. Cao, J. Wang, C. Wu, C. Li, J. Guo, B. Liu, W. Chen and Y. Lin, *Electrochim. Acta*, 2018, **292**, 407-418.
- 3 S. A. Shah, X. Shen, M. Xie, G. Zhu, Z. Ji, H. Zhou, K. Xu, X. Yue, A. Yuan, J. Zhu and Y. Chen, *Small*, 2019, **15**, 1804545.
- 4 F. Li, L. Zhang, J. Li, X. Lin, X. Li, Y. Fang, J. Huang, W. Li, M. Tian, J. Jin and R. Li, *J. Power Sources*, 2015, **292**, 15-22.
- 5 J. G. Li, K. Xie, H. Sun, Z. Li, X. Ao, Z. Chen, K. K. Ostrikov, C. W. Wang and W. Zhang, *Appl. Mater. interfaces*, 2019, **11**, 36649-36657.
- 6 C. Liu, Y. Guo, Z. Yu, H. Wang, H. Yao, J. Li, K. Shi and S. Ma, *Nanotechnology*, 2020, **31**, 035403.
- 7 Y. Luo, X. Li, X. Cai, X. Zou, F. Kang, H. M. Cheng and B. Liu, *ACS Nano*, 2018, **12**, 4565-4573.
- 8 L. Diao, B. Zhang, Q. Sun, N. Wang, N. Zhao, C. Shi, E. Liu and C. He, *Nanoscale*, 2019, **11**, 21479-21486.
- 9 J. Zhang, T. Wang, P. Liu, S. Liu, R. Dong, X. Zhuang, M. Chen and X. Feng, *Energy Environ. Sci.*, 2016, **9**, 2789-2793.
- 10 J. Liang, C. Ding, J. Liu, T. Chen, W. Peng, Y. Li, F. Zhang and X. Fan, *Nanoscale*, 2019, **11**, 10992-11000.
- 11 J. He, L. Song, J. Yan, N. Kang, Y. Zhang and W. Wang, *Metals*, 2017, **7**, 211.
